# Supplementary material for: A Cell System-Assisted Strategy for Evaluating the Natural Antioxidant-Induced Double-Stranded DNA Break (DSB) Style
Source: MDPI journal article supplement (doi:10.3390/genes14020420), 2023-02-06
Supplement: s1 [file s1]

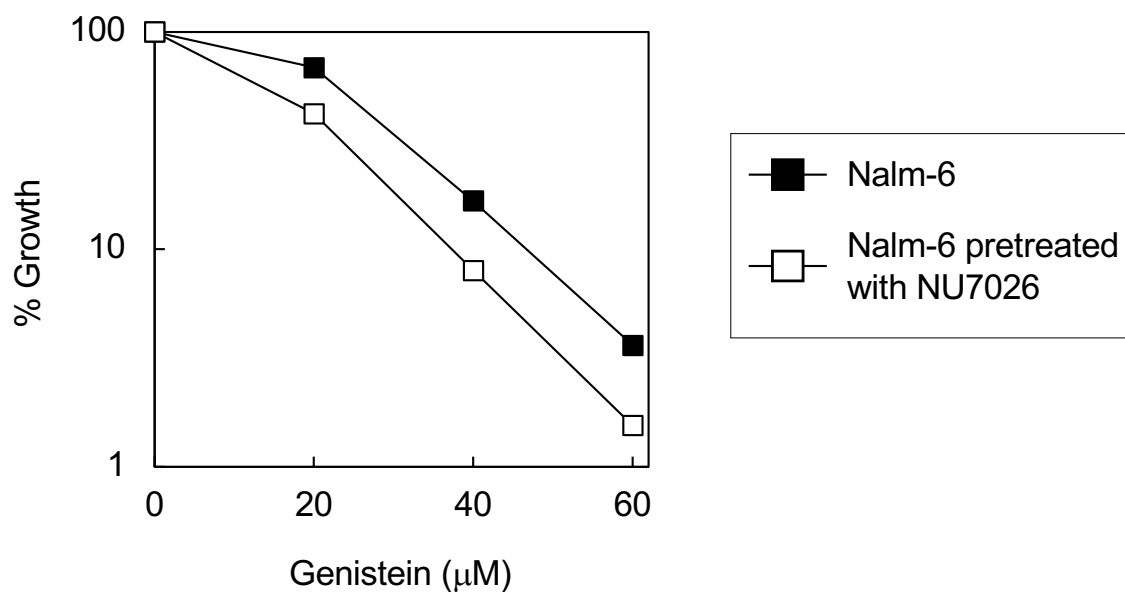

**Supplementary Figure S1.** Sensitivity of Nalm-6 cells pretreatment with NU7026 to genistein. Nalm-6 cells were treated with 10  $\mu\text{M}$  NU7026 for 1 hour, then cultured with growth medium containing various concentration of genistein for 96 hours. Subsequently, cell growth was measured using the CellTiter-Glo Luminescent Cell Viability Assay Kit (Promega, Fitchburg, WI, USA) (n=1).
